# Supplementary material
Source: Royal Society of Chemistry journal article supplement (doi:10.1039/d5nr05064b)
Supplement: d5nr05064b1.pdf [file d5nr05064b1.pdf]

## 24 **Materials and Methods**

### 25 **Methods**

#### 26 **Training dataset, data processing, and model design of LMCDPS**

27 The training dataset for LMCDPS was established using more than 70,000 natural  
28 compounds collected from public databases including TCMBank and DrugBank. A  
29 multidimensional knowledge base was constructed, covering 2D/3D molecular  
30 structures, natural sources, and reported bioactivities of these compounds. Molecular  
31 fingerprints with 2048 dimensions were generated using RDKit, an open-source  
32 cheminformatics toolkit, to characterize molecular properties including atomic type,  
33 charge, chirality, hybridization, aromaticity, bond type, and conjugation. Compounds  
34 associated with triple-negative breast cancer (TNBC), immune regulation, or drug self-  
35 assembly potential were included, while those without complete molecular structure  
36 annotations or available bioactivity data were excluded. A 5-fold cross-validation  
37 strategy was applied to split the training and validation sets, and an independent  
38 experimental set composed of flavonoid-cisplatin combinations was used as the test set.  
39 Since LMCDPS was designed as a function-oriented screening platform rather than a  
40 conventional binary classification model, the generalizability of the model was mainly  
41 evaluated based on experimental consistency.

42

#### 43 **Pathway-protein contextual encoding**

44 Pathway annotations were obtained from DrugBank, KEGG and Gene Ontology (GO)  
45 databases, and only pathway-protein interactions supported by experimental evidence  
46 were retained. Pathways relevant to triple-negative breast cancer (TNBC) were selected

47 based on their association with TNBC biology, molecular self-assembly and cisplatin  
48 synergy, as well as direct protein-pathway regulatory relationships. These annotations  
49 were incorporated into the model as contextual biological features and processed jointly  
50 with molecular fingerprint representations through the Transformer attention  
51 mechanism.

52

### 53 **LMCDPS-based compound screening**

54 To identify natural compounds capable of self-assembling with cisplatin and exhibiting  
55 synergistic antitumor activity in TNBC, we developed a multi-objective scoring  
56 framework within the LMCDPS platform. The scoring system incorporated four  
57 biological endpoints: breast cancer target relevance, apoptosis regulation, immune  
58 modulation, and drug-assembly compatibility. These endpoints were further  
59 summarized into two functional dimensions, namely a self-assembly score and a  
60 synergistic activity score.

61 All endpoints were normalized to a 0-1 scale based on molecular structural features and  
62 pathway-protein contextual relevance. Candidate compounds showing high scores in  
63 both dimensions were retained for further analysis. For these candidates, scores were  
64 aggregated using a weighted strategy emphasizing TNBC-related pathways and self-  
65 assembly potential. Molecular similarity calculated from 2048-dimensional RDKit  
66 fingerprints was incorporated into the weighting scheme to refine ranking. Based on  
67 the final composite score, the top 12 candidate compounds were selected for further  
68 evaluation.

69 **Molecular Dynamics Simulation Module (LMCDPS-MD)**

70 To validate whether the predicted drug combinations exhibit potential conformational  
71 synergy or self-assembly behavior, we developed the LMCDPS-MD module.  
72 Candidate molecules are subjected to molecular dynamics (MD) simulations using  
73 AmberTools or GROMACS. Then, ten copies of the molecule were randomly placed in  
74 a  $6 \times 6 \times 6 \text{ nm}^3$  periodic water box. Periodic boundary conditions were applied  
75 throughout the simulation. The cutoff distance for non-bonded interactions was  $12 \text{ \AA}$ ,  
76 and long-range electrostatic interactions were treated using the particle mesh Ewald  
77 (PME) method. Hydrogen bonds were constrained using the LINCS algorithm, with an  
78 integration timestep of 2 fs. Temperature was maintained at 310 K using a V-rescale  
79 thermostat (coupling constant 1.0 ps), and pressure was controlled at 1 bar using the  
80 Berendsen barostat. After system construction, 50,000 steps of energy minimization  
81 were performed, followed by 100 ps NVT equilibration. Subsequently, a 100 ns  
82 production simulation under the NPT ensemble was conducted, and the resulting  
83 trajectories were used for structural analysis. Conformational dynamics and stability  
84 are assessed through metrics such as root-mean-square deviation (RMSD) and  
85 hydrogen bonding analysis:

86 
$$\text{RMSD}(t) = \sqrt{\frac{1}{N} \sum_{i=1}^N |\mathbf{r}_i(t) - \mathbf{r}_i(0)|^2}$$

87 The simulations additionally yield bonding energy profiles, hydrophobic/hydrophilic  
88 contact matrices, and assembly propensity maps, providing a comprehensive  
89 assessment of the structural stability and potential synergistic mechanisms within the  
90 drug combination system. A single simulation trajectory was analyzed for each system,

91 and structural stability was evaluated over the full 100 ns simulation timescale.

92

### 93 **Preparation of Persimmon Leaf Flavonoids (PLF)**

94 Take 600 g of persimmon leaves, wash and cut them (size  $\leq 4 \times 4$  cm), soak in distilled  
95 water at 80-95 °C for 60 min, collect light green hot water, freeze-dry after reducing  
96 pressure and obtained 115 g of freeze-dried powder. The concentration of persimmon  
97 leaf extract (PLE) before lyophilization was calculated to be 2.0 mg/mL. PLE was  
98 extracted by petroleum ether to remove non-polar impurities, further purified by HP-20  
99 microporous resin, and collected 70% ethanol eluate and lyophilized it to obtain total  
100 flavonoid extract (PLF). The total flavonoids content was determined by  $\text{NaNO}_2$ -  
101  $\text{Al}(\text{NO}_3)_3$ -NaOH colorimetric method. The flavonoid content is 835.28  $\mu\text{g}/\text{mg}$  (83.5%).

102

### 103 **LC-ESI-MS/MS analyses**

104 LC-MS analysis was performed on Waters SYNAPT G2-Si HDMS (Waters  
105 Corporation, Milford, USA) mass spectrometer equipped with an electrospray  
106 ionization source, with an analytical column (ACQUITY UPLC® HSS T3 2.1  $\times$  100,  
107 1.8  $\mu\text{m}$ ). The MS analysis was performed in negative ion mode under the following  
108 conditions: cone gas ( $\text{N}_2$ ), 50 L/h; desolvation gas, 800 L/h; source temperature, 120 °C;  
109 desolvation temperature, 450 °C; atomizer gas pressure ( $\text{N}_2$ ), 6.0 Bar; capillary voltage,  
110 2.0 kV; sampling cone, 40 V; and source offset, 80 V. The sample was analyzed in MSE  
111 continuum mode and the scanning range was 100-2000 Da. A collision energy ramp  
112 was set at 20-60 V in the function 2-high energy tunnel. For accurate mass acquisition,

113 an external reference (0.2 ng/ $\mu$ L Leucine-Enkephalin) was used with a lock spray  
114 interface at a flow rate of 10  $\mu$ L/min, generating reference ions at 554.2615 Da in  
115 negative ion mode.

116 Using the mobile phase consisting of acetonitrile (B) and 0.1% formic acid in water (A),  
117 gradient elution was performed as follows: 0.00-3.00 min, 2%-2% B; 3.00-15.00 min,  
118 2%-34% B; 15.00-25.00 min, 34%-34% B; 25.00-50.00 min, 34%-60% B; 50.00-55.00  
119 min, 60%-100% B; 55.00-59.00 min, 100%-100% B; The column temperature,  
120 injection volume, and flow rate were 40 °C, 2  $\mu$ L, and 0.3 ml/min, respectively. The  
121 MS data were processed through MassLynx v 4.1 (Waters Corporation, Milford, MA,  
122 USA) software, which provided a list of possible elemental formulae. The accuracy for  
123 confirmation of the compounds was established on the basis of their error less than  
124 10 ppm and MSn fragment matching.

### 125 **Self-assembled properties**

126 The particle size, zeta potential, and polydispersity index (PDI) of PLF-Cis NPs were  
127 measured using a Malvern Zetasizer Nano ZS particle analyzer. All measurements were  
128 performed in deionized water at room temperature; the pH and ionic strength were not  
129 adjusted. The morphology of the nanoparticles was observed using a JEM-2100  
130 transmission electron microscope (TEM, Tokyo, Japan).

### 131 **Cell cultures**

132 All cell lines used in this study, including mouse mammary carcinoma cells (4T1), were  
133 obtained from a certified cell bank (Nanjing KeyGen Biotech Co., Ltd.) and routinely  
134 tested for mycoplasma contamination using a standard detection assay, with negative

135 results prior to use. Cells were cultured in DMEM supplemented with 10% fetal bovine  
136 serum (FBS, GIBCO, USA) and 1% penicillin–streptomycin in a humidified incubator  
137 at 37 °C with 5% CO<sub>2</sub>.

#### 138 **MTT Assay**

139 After 24 h of seeding 4T1 cells into 96-well plates, gradient concentrations of Cisplatin,  
140 PLF or PLF-Cis NPs were added to the medium to treat the cells for 24 h. To ensure  
141 comparability among groups, the administered doses of PLF-Cis NPs were normalized  
142 according to their equivalent cisplatin concentration. Subsequently, the MTT reagent  
143 was added for approximately 4 h, followed by absorbance measurement using a  
144 microplate reader. For inhibitor experiments, CQ (autophagy inhibitor), Fer-1  
145 (ferroptosis inhibitor), Nec-1 (necroptosis inhibitor), and v-ZAD-fmk (apoptosis  
146 inhibitor) were added to the cells 1 h prior treatment. The concentrations of inhibitors  
147 were as previously described. Each group had 6 replicate wells, and each experiment  
148 was repeated three times.

#### 149 **Bliss Independence Model:**

150 Based on the cell inhibition rates detected by the MTT assay, the measured inhibition  
151 rates for each group ( $E_A$ ,  $E_B$ ) were calculated. According to the Bliss independence  
152 model, the theoretical expected inhibition rate was calculated as  $E_{\text{expected}} = E_A + E_B -$   
153  $(E_A \times E_B)$ . Drug interaction was evaluated by calculating the synergy difference value  
154  $\Delta E = E_{\text{observed}} - E_{\text{expected}}$ :  $\Delta E > 0$  indicates a synergistic effect,  $\Delta E = 0$  indicates an additive  
155 effect, and  $\Delta E < 0$  indicates an antagonistic effect.

#### 156 **Colony formation assay**

157 Colony formation assay was conducted as described previously. Briefly, 600 4T1 cells  
158 were seeded in each well of 6-well plates. Following the specified treatments, cells were  
159 cultured at 37 °C for 10–14 days to facilitate colony formation. The colonies were fixed  
160 with 4 % paraformaldehyde, stained with crystal violet, and then counted.

#### 161 **Apoptosis detection**

162 After seeding 4T1 for 24 h, Cisplatin, PLF and PLF-Cis NPs were added to the medium  
163 for 24 h or 48 h incubation. Subsequently, all cells were collected and washed twice  
164 with PBS, then resuspended in Annexin-V Binding Buffer and stained with Annexin V-  
165 FITC/PI for 10 min. Stained cells were analyzed using flow cytometry.

#### 166 **Cellular uptake**

167 We chose 4T1 cells to study the cellular uptake. To elucidate the internalization  
168 mechanism, cells were pretreated with specific endocytosis inhibitors (amiloride,  
169 chlorpromazine, and methyl- $\beta$ -cyclodextrin) prior to incubation with PLF-Cis NPs or  
170 free cisplatin. The intracellular platinum content was then measured by ICP-MS  
171 according to the manufacturer's instructions. Prior to analysis, cell samples were  
172 digested with nitric acid to ensure complete dissolution. Rhodium (Rh) was employed  
173 as an internal standard to correct for instrumental drift and matrix effects, ensuring  
174 accurate quantification. The platinum content was normalized to cell number and  
175 expressed as ng per  $10^6$  cells.

#### 176 **Cell cycle analysis**

177 After seeding 4T1 for 24 h, Cisplatin, PLF and PLF-Cis NPs were added to the medium  
178 for 24 h incubation. Following the treatment period, the cells were harvested and

179 washed with PBS. They were then fixed with 70% (v/v) ethanol at -20 °C for at least  
180 24 h. the fixed cells were centrifuged and washed twice with PBS before being stained  
181 with propidium iodide dye, along with RNase, for 30 min in the dark at 37 °C. Flow  
182 cytometry was employed to analyze the resulting data, which were independently  
183 measured three times.

#### 184 **Wound-healing assay**

185 Cells were seeded in 6-well plates, and once they reached full confluency, uniform  
186 straight lines were drawn in the wells using a 200 µL pipette tip. Subsequently, Cisplatin,  
187 PLF and PLF-Cis NPs were added to the medium without FBS. Photographs were taken  
188 at 0 h and 24 h at the same locations *via* Zen Blue 3.1 Imaging System.

#### 189 **ROS generation assay**

190 After incubating cells with Cisplatin, PLF and PLF-Cis NPs for 24 h or 48 h. After  
191 rinsing with PBS, the cells were labeled with DCFH-DA and subsequently detected by  
192 flow cytometry (BD LSRFortessa SORP, USA) and normalized to the number of cells  
193 in each sample to ensure accurate comparisons between treatment groups.

#### 194 **Western blot analysis**

195 Following cell treatment, the cells were collected and lysed with RIPA buffer. The  
196 lysates were quantified using a BCA protein assay kit and normalized by adding PBS  
197 to adjust the protein concentrations. Protein samples were separated by 12.5% SDS-  
198 PAGE gel electrophoresis and transferred to PVDF membranes. The membranes were  
199 blocked with 5% skim milk for 1 h, washed three times with TBST, and then incubated  
200 overnight at 4 °C with antibodies. Subsequently, appropriate secondary antibodies were

201 added, and protein bands were detected using enhanced chemiluminescence (ECL).

202 **Results**

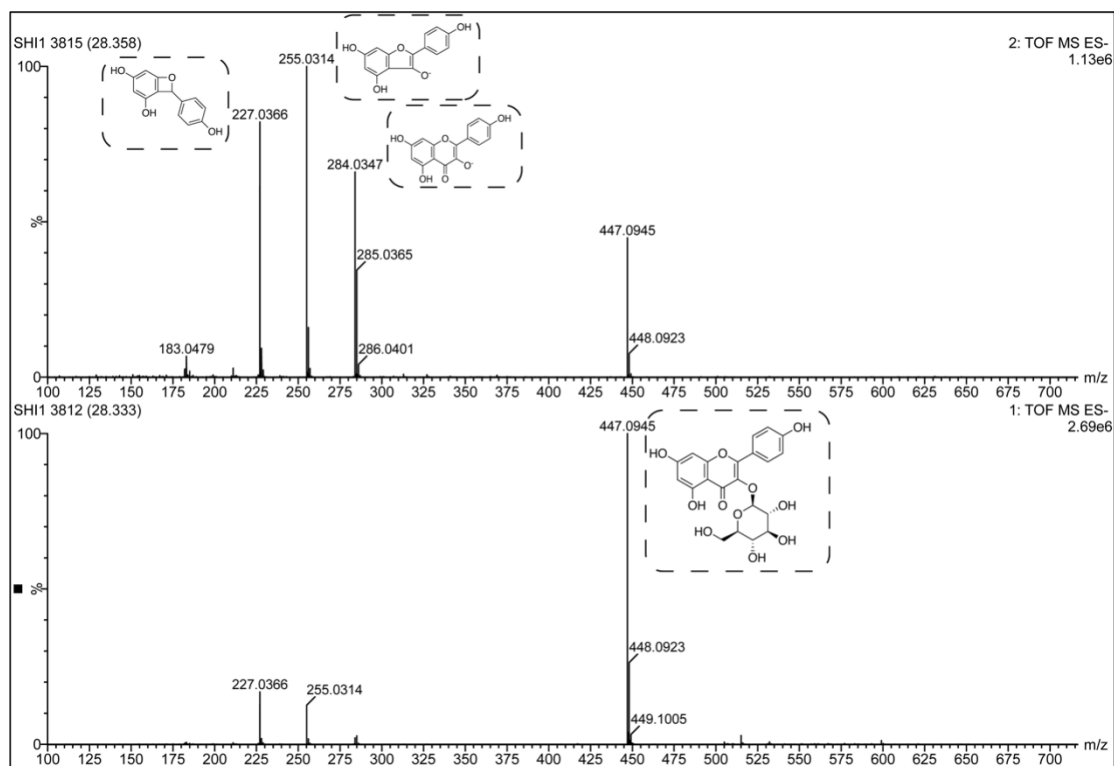

203

204

205

206

**Figure S1. An example-based analysis of fragmentation peaks in LC-MS/MS.**

**Table S1. UPLC-ESI-MS/MS information of PLF**

| Peak | RT    | MS       | MS <sup>n</sup>                         | Formula                                         | ppm  | Identify                                                        | Integrate |
|------|-------|----------|-----------------------------------------|-------------------------------------------------|------|-----------------------------------------------------------------|-----------|
| 1    | 6.236 | 897.1915 | 711.1351/593.1284/<br>407.0729/289.0687 | C <sub>45</sub> H <sub>38</sub> O <sub>20</sub> | 4.1  | Prodelfinidin C2;<br>GC-C-C                                     | 98331     |
| 2    | 6.699 | 609.1236 | 423.0684/305.0686/<br>177.0190          | C <sub>30</sub> H <sub>26</sub> O <sub>14</sub> | -1.3 | Helichryoside                                                   | 101501    |
| 3    | 7.339 | 881.1881 | 407.0729/177.0190/<br>289.0687/593.1284 | C <sub>45</sub> H <sub>38</sub> O <sub>19</sub> | -5.4 | Catechin-<br>(4α->8)-<br>gallocatechin-<br>(4α->8)-<br>catechin | 153500    |
| 4    | 7.616 | 609.1236 | 423.0684/305.0686/<br>177.0190          | C <sub>30</sub> H <sub>26</sub> O <sub>14</sub> | -1.3 | Helichryoside                                                   | 43344     |
| 5    | 7.815 | 865.2003 | 695.1442/407.0729/<br>289.0687/243.0279 | C <sub>45</sub> H <sub>38</sub> O <sub>18</sub> | 2.7  | Procyanidin C1                                                  | 18527     |
| 6    | 7.965 | 331.0673 | 125.0254/168.0091/<br>177.0190/243.0279 | C <sub>13</sub> H <sub>16</sub> O <sub>10</sub> | 2.4  | beta-Glucogallin                                                | 75282     |
| 7    | 8.612 | 593.1284 | 407.0729/289.0687/<br>177.0190          | C <sub>30</sub> H <sub>26</sub> O <sub>13</sub> | -1.9 | Procyanidin                                                     | 296009    |

|    |            |          |                                                               |                                                 |      |                                                                         |         |
|----|------------|----------|---------------------------------------------------------------|-------------------------------------------------|------|-------------------------------------------------------------------------|---------|
| 8  | 9.067      | 305.0686 | 289.0761/177.0190/<br>125.0254                                | C <sub>15</sub> H <sub>14</sub> O <sub>7</sub>  | 8.2  | Epigallocatechin                                                        | 221726  |
| 9  | 9.255      | 593.1284 | 423.0684/305.0686/<br>177.0190/125.0254                       | C <sub>30</sub> H <sub>26</sub> O <sub>13</sub> | -1.9 | Epigallocatechin-<br>(4beta->8)-catechin                                | 122356  |
| 10 | 9.7        | 897.1915 | 711.1351/593.1284/<br>423.0684/289.0687/<br>177.0190          | C <sub>45</sub> H <sub>38</sub> O <sub>20</sub> | 4.1  | Prodelphinidin C2                                                       | 35610   |
| 11 | 10.18<br>3 | 881.1881 | 695.1328/407.0729/<br>377.0150/289.0687/<br>243.0279/177.0190 | C <sub>45</sub> H <sub>38</sub> O <sub>19</sub> | -5.4 | Gallocatechin-<br>(4alpha->8)-<br>catechin-<br>(4alpha->8)-<br>catechin | 37292   |
| 12 | 10.99<br>4 | 577.1362 | 407.0729/289.0687/<br>125.0254                                | C <sub>30</sub> H <sub>26</sub> O <sub>12</sub> | 2.8  | Procyanidin B1                                                          | 302654  |
| 13 | 11.2       | 865.2003 | 695.1442/407.0729/<br>289.0687/243.0279                       | C <sub>45</sub> H <sub>38</sub> O <sub>18</sub> | 2.7  | Procyanidin C1                                                          | 34565   |
| 14 | 11.76<br>2 | 401.1825 | 437.1597(+Cl)/447.<br>1869(+COOH)                             | C <sub>19</sub> H <sub>30</sub> O <sub>9</sub>  | 3.2  | Spionoside A                                                            | 83727   |
| 15 | 12.16<br>1 | 289.0687 | 245.0813/203.0701                                             | C <sub>15</sub> H <sub>14</sub> O <sub>6</sub>  | -8.6 | Epicatechin                                                             | 366423  |
| 16 | 12.66<br>6 | 431.1545 | 204.0295/153.0201/                                            | C <sub>19</sub> H <sub>28</sub> O <sub>11</sub> | -1.9 | Benzyl<br>gentiobioside                                                 | 34516   |
| 17 | 13.40<br>5 | 729.1462 | 577.1362/407.0729/<br>289.0687/125.0254                       | C <sub>37</sub> H <sub>30</sub> O <sub>16</sub> | 0.8  | Procyanidin B2 3'-<br>O-gallate                                         | 25013   |
| 18 | 14.20<br>9 | 457.1317 | 323.1381/163.0427/<br>119.0489                                | C <sub>20</sub> H <sub>26</sub> O <sub>12</sub> | -6.3 | cis-p-Coumaric acid<br>4-[apiosyl-(1->2)-<br>glucoside]                 | 99282   |
| 19 | 14.67<br>8 | 401.1476 | 167.0370/269.1050/<br>437.1597(+Cl)/447.<br>1869(+COOH-)      | C <sub>18</sub> H <sub>26</sub> O <sub>10</sub> | 7    | Benzyl O-<br>[arabinofuranosyl-<br>(1->6)-glucoside]                    | 106561  |
| 20 | 15.40<br>3 | 517.2281 | 205.1225/153.0957/<br>125.0254/553.2084/<br>563.2368          |                                                 |      | Unknown                                                                 | 116415  |
| 21 | 16.83<br>3 | 415.1567 | 451.1387/461.1646                                             |                                                 |      | Unknown                                                                 | 103541  |
| 22 | 18.41<br>2 | 479.0873 | 316.0264/287.0232/<br>271.0283                                | C <sub>21</sub> H <sub>20</sub> O <sub>13</sub> | 9.8  | Myricetin 3-<br>galactoside                                             | 551516  |
| 23 | 18.94<br>5 | 631.0887 | 479.0777/317.0287/<br>271.0283/151.0065                       | C <sub>28</sub> H <sub>24</sub> O <sub>17</sub> | -7.6 | Myricetin 3-O-beta-<br>D-galactoside 6"-O-<br>gallate                   | 21412   |
| 24 | 20.02      | 449.0727 | 316.0264/271.0283/<br>137.0238                                | C <sub>20</sub> H <sub>18</sub> O <sub>12</sub> | 1.6  | Myricetin 3-<br>arabinoside                                             | 19953   |
| 25 | 21.71      | 463.089  | 300.0252/271.0283/<br>255.0314/243.0279                       | C <sub>21</sub> H <sub>20</sub> O <sub>12</sub> | 2.8  | Hyperoside                                                              | 1126258 |

|    |       |          |                                                               |                                                 |      |                                                             |         |
|----|-------|----------|---------------------------------------------------------------|-------------------------------------------------|------|-------------------------------------------------------------|---------|
| 26 | 22.36 | 463.089  | 300.0252/271.0283/<br>255.0314/243.0279                       | C <sub>21</sub> H <sub>20</sub> O <sub>12</sub> | 2.8  | Isoquercetin                                                | 2091298 |
|    | 6     |          |                                                               |                                                 |      |                                                             |         |
| 27 | 23.44 | 615.0981 | 301.0396/313.0602/<br>271.0283/178.9999/<br>151.0065          | C <sub>28</sub> H <sub>24</sub> O <sub>16</sub> | -0.8 | 2"-Galloylhyperin                                           | 2292035 |
|    | 3     |          |                                                               |                                                 |      |                                                             |         |
| 28 | 24.3  | 493.0953 | 433.0789/315.0181/<br>300.0252/271.0283/<br>255.0314/243.0279 | C <sub>22</sub> H <sub>22</sub> O <sub>13</sub> | -5.9 | Quercetagenin 3'-<br>methylether 7-<br>glucoside            | 24356   |
| 29 | 26.18 | 447.0945 | 284.0347/255.0314/<br>227.0366                                | C <sub>21</sub> H <sub>20</sub> O <sub>11</sub> | 4    | Trifolin                                                    | 2167683 |
|    | 5     |          |                                                               |                                                 |      |                                                             |         |
| 30 | 28.34 | 447.0945 | 284.0347/255.0314/<br>227.0366                                | C <sub>21</sub> H <sub>20</sub> O <sub>11</sub> | 4    | Astragalin                                                  | 3506801 |
| 31 | 28.88 | 599.099  | 313.0602/285.0439/<br>257.0438/229.0479                       | C <sub>28</sub> H <sub>24</sub> O <sub>15</sub> | -7.8 | Trifolin 6"-gallate                                         | 1727354 |
|    | 8     |          |                                                               |                                                 |      |                                                             |         |
| 32 | 30.00 | 599.099  | 313.0602/285.0439/<br>257.0438/229.0479                       | C <sub>28</sub> H <sub>24</sub> O <sub>15</sub> | -7.8 | Astragalin 6"-<br>gallate                                   | 3316537 |
|    | 4     |          |                                                               |                                                 |      |                                                             |         |
| 33 | 32.58 | 569.097  | 417.0808/285.0439/<br>227.0366                                | C <sub>27</sub> H <sub>22</sub> O <sub>14</sub> | 6.9  | Kaempferol 3-(2"-<br>galloyl-alpha-L-<br>arabinopyranoside) | 43232   |
|    | 6     |          |                                                               |                                                 |      |                                                             |         |
| 34 | 33.94 | 569.097  | 417.0808/285.0439/<br>227.0366                                | C <sub>27</sub> H <sub>22</sub> O <sub>14</sub> | 6.9  | Kaempferol 3-(2"-<br>galloyl-alpha-L-<br>arabinopyranoside) | 36372   |
|    | 4     |          |                                                               |                                                 |      |                                                             |         |
| 35 | 22.64 | 615.0981 | 301.0396/313.0602/<br>271.0283/178.9999/                      | C <sub>28</sub> H <sub>24</sub> O <sub>16</sub> | -0.8 | 2"-Galloylhyperin                                           | 646310  |

207  
208

**Table S2. Concentrations of PLFs**

| Compound                 | Linear Equation           | R <sup>2</sup> | Concentration(µg/mL) |
|--------------------------|---------------------------|----------------|----------------------|
| Catechin                 | y = 206025x + 49308       | 0.997          | 18.8                 |
| Kaempferol               | y = 280075x + 23183       | 0.995          | -                    |
| Quercitrin               | y = 31209x + 7286         | 0.998          | 0.33                 |
| <b>Isoquercitrin</b>     | y = 62056x + 18910        | 0.997          | <b>86.7</b>          |
| Hyperoside               | y = 1,125,348 x + 239,278 | 0.998          | 21.4                 |
| <b>Astragalin</b>        | y = 1,143,091x + 256,623  | 0.998          | <b>68.6</b>          |
| Kaempferol-3-O-glucoside | y = 3,184,922 x + 132,405 | 0.999          | 16.8                 |
| Myricetin-3-O-glucoside  | y = 1,387,059x + 3,903    | 0.999          | 13.6                 |

|                           |                            |       |             |
|---------------------------|----------------------------|-------|-------------|
| Myricetin 3-arabinoside   | $y = 136487x + 27052$      | 0.998 | 9.19        |
| Procyanidin B1            | $y = 154443x + 3065$       | 0.999 | 7.44        |
| <b>2''-Galloylhyperin</b> | $y = 1,290,731 x + 62,282$ | 0.998 | <b>53.4</b> |

209

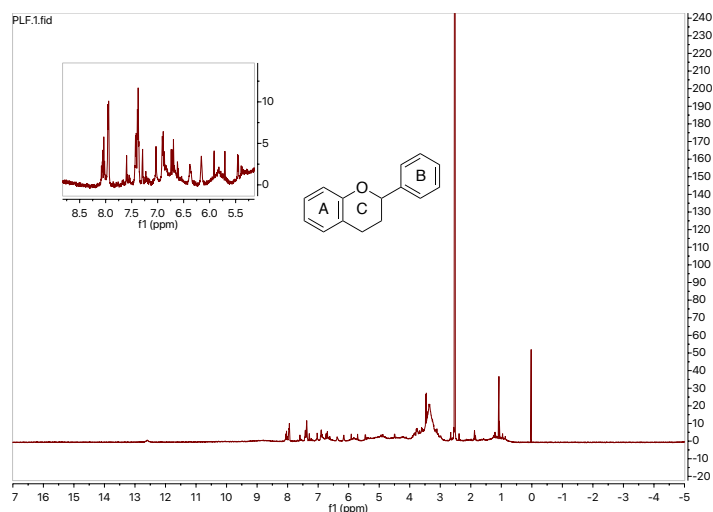

210

211

Figure S2. The <sup>1</sup>H NMR spectrum of PLF

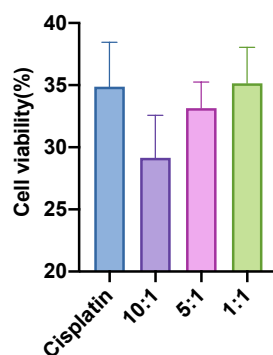

212

213

214

Fig S3. Cell viability of PLF and cisplatin at different ratios

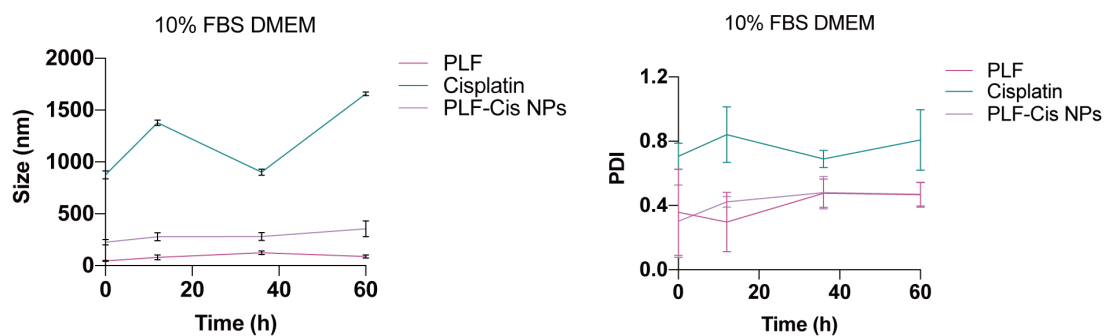

215

216

Figure S4. Nanoparticle Stability in DMEM culture medium containing 10% FBS over 60 h.

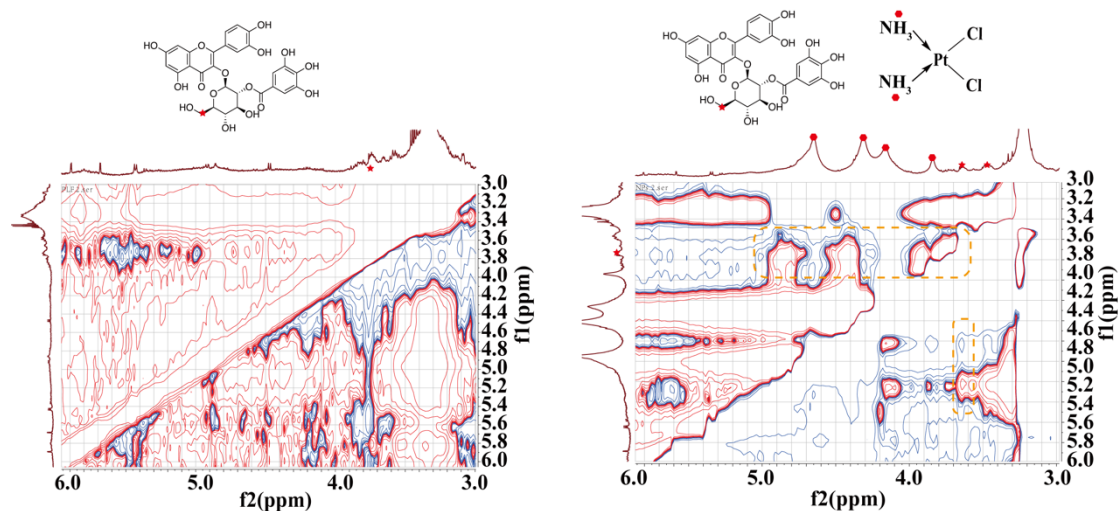

Figure S5. 2D-NOESY-NMR Results

Table S3 Particle Size, Polydispersity Index (PDI), and Zeta Potential of Different Formulations

|          | Cisplatin   | PLF       | Cisplatin+PLFs | Cisplatin+Astragaline | PLF-Cis NPs |
|----------|-------------|-----------|----------------|-----------------------|-------------|
| Size(nm) | 950.6±240.4 | 140.1±7.2 | 620.0±271.5    | 680.6±272.5           | 160.2±30.9  |
| Zeta(mV) | +13.5±5.3   | -17.3±3.0 | -0.3±0.1       | -13.0±1.1             | -20.4±3.6   |
| PDI      | 0.75±0.2    | 0.35±0.1  | 0.86±0.3       | 0.75±0.3              | 0.24±0.1    |

Table S4. Cytotoxicity of Cisplatin, PLF, PLF-Cis NPs by MTT assay ( $IC_{50}$ ,  $\mu\text{g mL}^{-1}/48\text{h}$ ).

| Compound    | Cell ( $IC_{50}/\mu\text{g mL}^{-1}$ ) |           |            |
|-------------|----------------------------------------|-----------|------------|
|             | 4T1                                    | MCF-7     | MDA-MB-231 |
| Cisplatin   | 1.84±0.14                              | 3.46±0.47 | >30        |
| PLF         | >300                                   | >300      | >300       |
| PLF-Cis NPs | 0.64±0.023                             | 1.71±0.08 | 17.46±2.28 |

Table S5. Cytotoxicity of Cisplatin, PLF-Cis NPs, PLF+Cisplatin by MTT assay (24 h).

| Compound       | Cell ( $IC_{50}/\mu\text{M}$ ) |
|----------------|--------------------------------|
| Cisplatin      | 12.7±1.03                      |
| PLF-Cis NPs    | 3.3±0.81                       |
| PLF+ Cisplatin | 4.8±0.45                       |

226

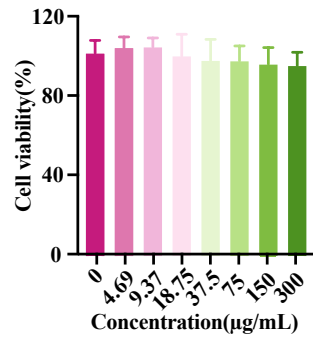

227

228

Figure S6. The cytotoxicity of PLF.

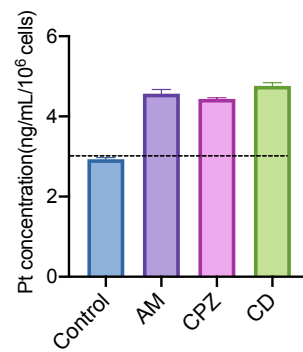

229

230

Fig. S7 Investigation of the internalization mechanism of PLF-Cis NPs.

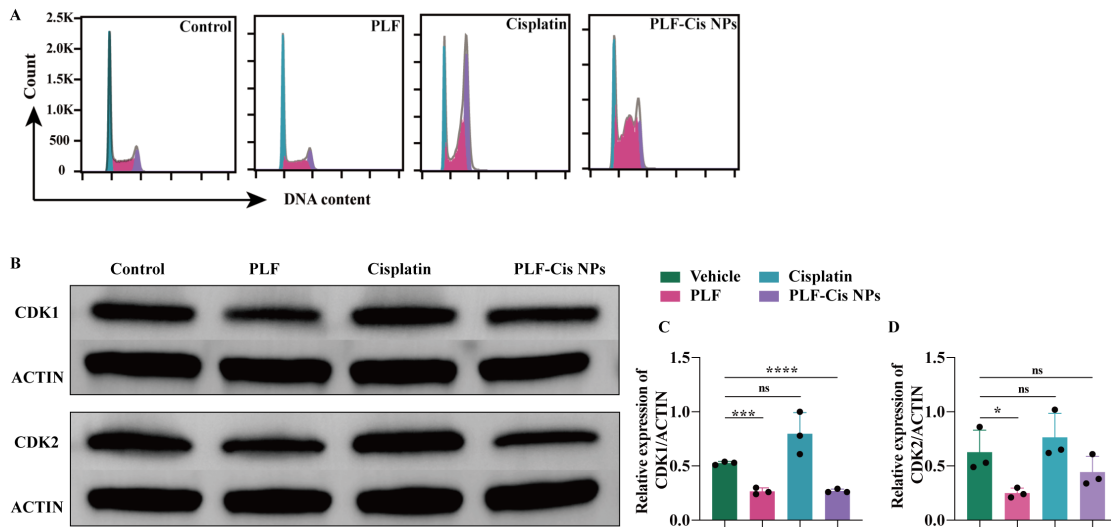

231

232

233

Figure S8. (A) Effect of PLF-Cis NPs on the cell cycle. (B-F) CDK1 and CDK2 expression determined by western blot.

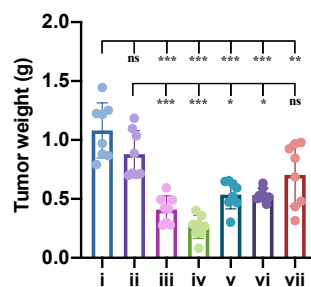

234

235

**Fig. S9 Tumor weight of 4T1 orthotopic tumor-bearing mice**

236

(i: vehicle; ii: cisplatin 1 mg/kg; iii: cisplatin 2 mg/kg; iv: PLF-Cis NPs-high; v: PLF-Cis NPs-

237

medium; vi: PLF-Cis NPs-low; vii: PLF)

238

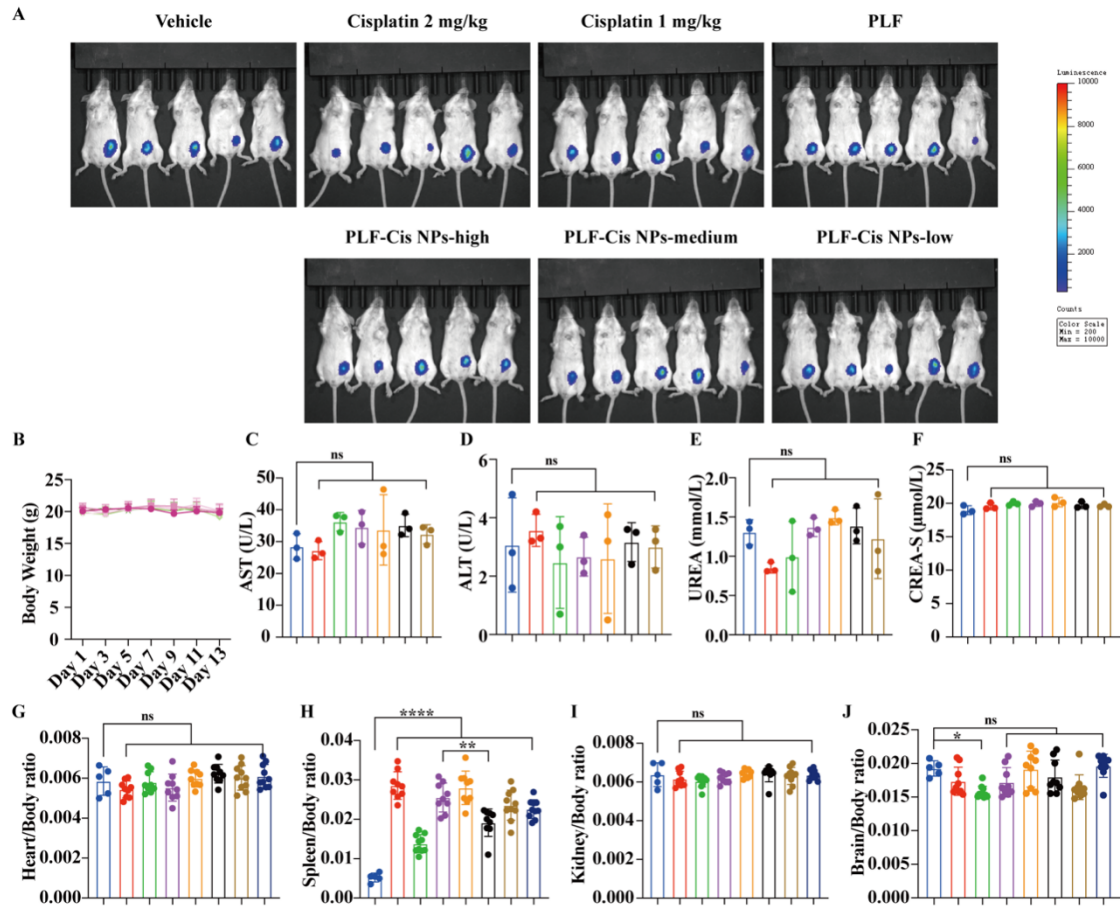

239

240 **Figure S10. (A) Living images of orthotopic 4T1 tumor-bearing mice on 1<sup>st</sup> day of treatments.**

241 **(B) Body weights of orthotopic 4T1 tumor-bearing mice during treatment. (C-F) The changes**

242 **of serum biochemical indicators (ALT, AST, UREA, CREA-S) after different treatments. (G-**

243 **J) Viscerosomatic ratio of major organs after different treatments.**

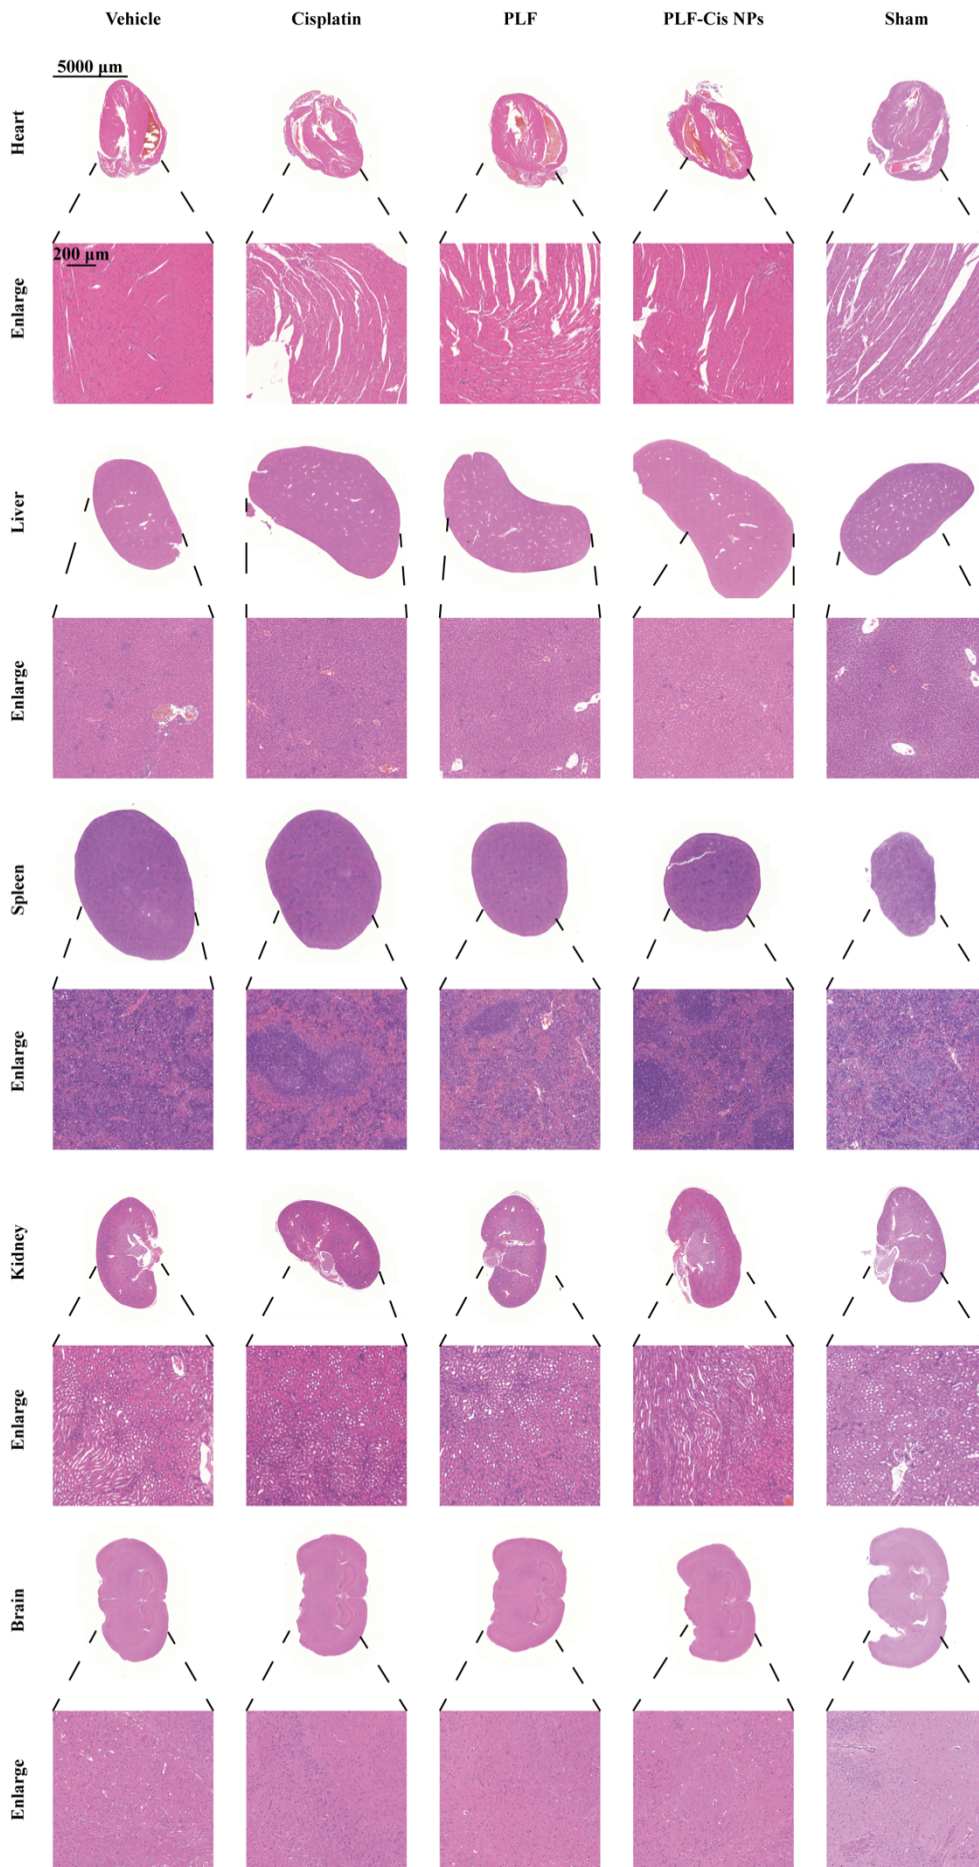

245 **Figure S11. The H&E staining of major organ sections (heart, liver, spleen, kidney and brain)**  
 246 **after different treatments.**  
 247

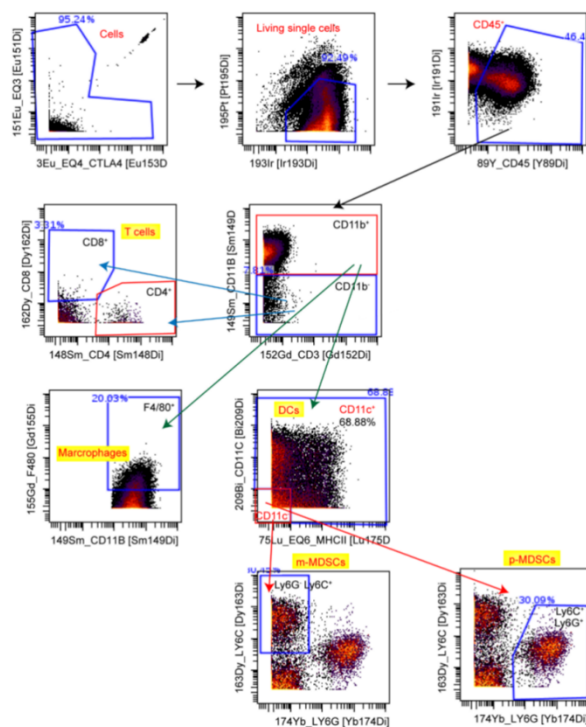

248

249

**Fig. S12 Gating strategy of CyTOF analysis<sup>1</sup>**

250

251 **Reference:**

252 1. D. Zhu, Y. Lu, L. Gui, W. Wang, X. Hu, S. Chen, Y. Wang and Y. Wang, *Acta Pharm Sin B*, 2022, **12**,  
 253 2592-2608.

254
